# Supplementary material for: Interdependent Impact of Lipoprotein Receptors and Lipid-Lowering Drugs on HCV Infectivity
Source: MDPI journal article supplement (doi:10.3390/cells10071626), 2021-06-29
Supplement: s1 [file s1]

**Table S2.** Characteristics of patients (matching 1; cirrhosis, genotype; 2:1; in order of appearance).

|                               | patients with statin use at TS | patients without statin use at TS |
|-------------------------------|--------------------------------|-----------------------------------|
| <b>number of patients [n]</b> | <b>41</b>                      | <b>82</b>                         |
| age [years; median, range]    | 63 (31-80)                     | 56 (24-78)                        |
| sex [n, %]                    |                                |                                   |
| male                          | 23 (56.1)                      | 36 (43.9)                         |
| female                        | 18 (43.9)                      | 46 (56.1)                         |
| genotype [n, %]               |                                |                                   |
| 1                             | 30 (73.2)                      | 60 (73.2)                         |
| 1/2                           | 0 (0)                          | 0 (0)                             |
| 1/4                           | 0 (0)                          | 0 (0)                             |
| 1/6                           | 1 (2.4)                        | 2 (2.4)                           |
| 2                             | 7 (17.1)                       | 14 (17.1)                         |
| 2/4                           | 0 (0)                          | 0 (0)                             |
| 3                             | 1 (2.4)                        | 2 (2.4)                           |
| 4                             | 0 (0)                          | 0 (0)                             |
| 5                             | 1 (2.4)                        | 2 (2.4)                           |
| 6                             | 0 (0)                          | 0 (0)                             |
| n/a                           | 1 (2.4)                        | 2 (2.4)                           |
| used HCV regimen [n, %]       |                                |                                   |
| ELB/GRZ                       | 15 (36.6)                      | 0 (0)                             |
| SOF/LDV±RBV                   | 10 (24.4)                      | 25 (30.5)                         |
| SOF/RBV±PEG-IFN               | 4 (9.8)                        | 35 (42.7)                         |
| GLE/PIB                       | 3 (7.3)                        | 3 (3.6)                           |
| VEL/SOF±RBV                   | 3 (7.3)                        | 5 (6.1)                           |
| OMB/PTV/r/DSV±RBV             | 3 (7.3)                        | 5 (6.1)                           |
| OMB/PTV/r±RBV                 | 0 (0)                          | 0 (0)                             |
| SOF/DAC±RBV                   | 1 (2.4)                        | 4 (4.9)                           |
| SOF/SIM±RBV                   | 1 (2.4)                        | 5 (6.1)                           |
| VEL/SOF/VOX                   | 1 (2.4)                        | 0 (0)                             |
| SIM/RBV/PEG-IFN               | 0 (0)                          | 0 (0)                             |
| cirrhosis [n, %]              | 9 (22.0)                       | 18 (22.0)                         |
| n/a                           | 0 (0)                          | 0 (0)                             |
| statins [n, %]                |                                |                                   |
| simvastatin                   | 16 (39.0)                      | 0 (0)                             |
| pravastatin                   | 10 (24.4)                      | 0 (0)                             |
| atorvastatin                  | 9 (22.0)                       | 0 (0)                             |
| fluvastatin                   | 6 (14.6)                       | 0 (0)                             |

TS therapy start, n/a not applicable, HCV hepatitis C virus, OMB ombitasvir, PTV paritaprevir, r ritonavir, DSV dasabuvir, ELB elbasvir, GRZ grazoprevir, VEL velpatasvir, SOF sofosbuvir, GLE glecaprevir, PIB pibrentasvir, DAC daclatasvir, LDV ledipasvir, RBV ribavirin, SIM simeprevir, VOX voxilaprevir, PEG-IFN pegylated interferon.
