# Supplementary material for: Interdependent Impact of Lipoprotein Receptors and Lipid-Lowering Drugs on HCV Infectivity
Source: MDPI journal article supplement (doi:10.3390/cells10071626), 2021-06-29
Supplement: s1 [file s1]

**Table S1.** Characteristics of patients.

|                               | patients with statin use at TS | patients without statin use at TS |
|-------------------------------|--------------------------------|-----------------------------------|
| <b>number of patients [n]</b> | <b>41</b>                      | <b>717</b>                        |
| age [years; median, range]    | 63 (31-80)                     | 55 (18-85)                        |
| sex [n, %]                    |                                |                                   |
| male                          | 23 (56.1)                      | 401 (55.9)                        |
| female                        | 18 (43.9)                      | 316 (44.1)                        |
| genotype [n, %]               |                                |                                   |
| 1                             | 30 (73.2)                      | 501 (69.9)                        |
| 1/2                           | 0 (0)                          | 1 (0.1)                           |
| 1/4                           | 0 (0)                          | 2 (0.3)                           |
| 1/6                           | 1 (2.4)                        | 2 (0.3)                           |
| 2                             | 7 (17.1)                       | 26 (3.6)                          |
| 2/4                           | 0 (0)                          | 1 (0.3)                           |
| 3                             | 1 (2.4)                        | 143 (19.9)                        |
| 4                             | 0 (0)                          | 23 (3.2)                          |
| 5                             | 1 (2.4)                        | 6 (0.8)                           |
| 6                             | 0 (0)                          | 1 (0.3)                           |
| n/a                           | 1 (2.4)                        | 11 (1.5)                          |
| used HCV regimen [n, %]       |                                |                                   |
| ELB/GRZ                       | 15 (36.6)                      | 90 (12.6)                         |
| SOF/LDV±RBV                   | 10 (24.4)                      | 189 (26.4)                        |
| SOF/RBV±PEG-IFN               | 4 (9.8)                        | 104 (14.5)                        |
| GLE/PIB                       | 3 (7.3)                        | 67 (9.3)                          |
| VEL/SOF±RBV                   | 3 (7.3)                        | 85 (11.9)                         |
| OMB/PTV/r/DSV±RBV             | 3 (7.3)                        | 82 (11.4)                         |
| OMB/PTV/r±RBV                 | 0 (0)                          | 7 (1.0)                           |
| SOF/DAC±RBV                   | 1 (2.4)                        | 43 (6.0)                          |
| SOF/SIM±RBV                   | 1 (2.4)                        | 37 (5.2)                          |
| VEL/SOF/VOX                   | 1 (2.4)                        | 12 (1.7)                          |
| SIM/RBV/PEG-IFN               | 0 (0)                          | 1 (0.1)                           |
| cirrhosis [n, %]              | 9 (22.0)                       | 281 (39.2)                        |
| n/a                           | 0 (0)                          | 8 (1.1)                           |
| statins [n, %]                |                                |                                   |
| simvastatin                   | 16 (39.0)                      | 0 (0)                             |
| pravastatin                   | 10 (24.4)                      | 0 (0)                             |
| atorvastatin                  | 9 (22.0)                       | 0 (0)                             |
| fluvastatin                   | 6 (14.6)                       | 0 (0)                             |

TS therapy start, n/a not applicable, HCV hepatitis C virus, OMB ombitasvir, PTV paritaprevir, r ritonavir, DSV dasabuvir, ELB elbasvir, GRZ grazoprevir, VEL velpatasvir, SOF sofosbuvir, GLE glecaprevir, PIB pibrentasvir, DAC daclatasvir, LDV ledipasvir, RBV ribavirin, SIM simeprevir, VOX voxilaprevir, PEG-IFN pegylated interferon.
